# Supplementary material for: Arrhythmic Burden of Adult Survivors With Repaired Total Anomalous Pulmonary Venous Connection
Source: PubMed Central journal article supplement — CJC Pediatr Congenit Heart Dis. 2022 Sep 8;1(6):263–9. doi: 10.1016/j.cjcpc.2022.08.003 (PMC10642084; doi:10.1016/j.cjcpc.2022.08.003), 2022-09-08
Supplement: mmc1.pdf [file mmc1.pdf]

Supplementary material

**Supplemental Table S1. Early arrhythmias and evolution through follow-up**

| <b>Patients, age at latest follow-up</b> | <b>Type of TAPVC</b>              | <b>Age at surgery</b> | <b>Early arrhythmias (within 4 postoperative weeks)</b> | <b>Late arrhythmias (after 4 postoperative weeks)</b> | <b>Treatment during follow-up</b>                                                                                                                                                                                          |
|------------------------------------------|-----------------------------------|-----------------------|---------------------------------------------------------|-------------------------------------------------------|----------------------------------------------------------------------------------------------------------------------------------------------------------------------------------------------------------------------------|
| 1, 21 years                              | Supracardiac (Superior vena cava) | 1 month               | IART, sustained VT                                      | IART, non-sustained VT                                | EPS 19 years after surgery without ablation. At latest follow-up, this patient was under beta blocker.                                                                                                                     |
| 2, 19 years                              | Supracardiac *                    | 1 month               | IART                                                    | None                                                  | None                                                                                                                                                                                                                       |
| 3, 28 years                              | Supracardiac (Superior vena cava) | 1 month               | Sinus node dysfunction                                  | IART, sinus node dysfunction                          | Epicardial pacemaker implantation 2 months after surgery. Explantation of the pacemaker 6 years after implantation. (Explantation of pacemaker report was not available). During follow-up junctional rhythm was observed. |
| 4, 23 years                              | Cardiac (coronary sinus)          | 3 days                | Third degree atrioventricular block                     | IART, third degree atrioventricular block             | Epicardial pacemaker implantation 1 month after surgery. Two years after pacemaker implantation, documented constant sinus rhythm without atrioventricular                                                                 |

|             |         |         |                              |                        |                                                                                                                                                                                                                                                                                                                                   |
|-------------|---------|---------|------------------------------|------------------------|-----------------------------------------------------------------------------------------------------------------------------------------------------------------------------------------------------------------------------------------------------------------------------------------------------------------------------------|
|             |         |         |                              |                        | block. Explantation of the pacemaker 7 years after implantation because of atrial and ventricular lead fracture. EPS with ablation 21 years after surgery due to scarring associated IART in the right atrium. No reoccurrence of tachyarrhythmia documented. At latest follow-up, this patient was under beta blocker treatment. |
| 5, 16 years | Unknown | 3 weeks | IART, sinus node dysfunction | Sinus node dysfunction | Pacemaker implantation 36 months after surgery with battery replacement 9 years after implantation.                                                                                                                                                                                                                               |

IART intra-atrial reentrant tachycardia; VT ventricular tachycardia; EPS electrophysiological study

\*no further information concerning the type of TAPVC obtained

**Supplemental Table S2. Late arrhythmias and treatment through follow-up**

| <b>Patients, age at latest follow-up</b>             | <b>Age at surgery</b> | <b>Late arrhythmia</b>                                         | <b>Treatment</b>                                                                                             |
|------------------------------------------------------|-----------------------|----------------------------------------------------------------|--------------------------------------------------------------------------------------------------------------|
| 1, 20 years                                          | 2 months              | Non-sustained VT                                               | EPS 19 years after surgery without ablation                                                                  |
| 2, 21 years                                          | 2 months              | IART                                                           | EPS 19 years after surgery without ablation; cardiac medication with beta blocker on latest follow-up        |
| 3, 22 years                                          | 1 month               | IART                                                           | Non antiarrhythmic medication with oral anticoagulation. During the latest follow-up, discussion for an EPS. |
| 4, 38 years                                          | 2 months              | IART                                                           | None                                                                                                         |
| 5, 67 years                                          | 14 years              | IART                                                           | Non antiarrhythmic medication with calcium channel blocker on latest follow-up                               |
| 6, 34 years                                          | 2 months              | IART                                                           | Cardiac medication with betablocker on latest follow-up                                                      |
| 7, 16 years                                          | 2 months              | IART,<br>bradyarrhythmia<br>(slight sinus node<br>dysfunction) | None                                                                                                         |
| 8, 16 years                                          | 2 months              | Bradyarrhythmia                                                | None                                                                                                         |
| Patients 9-12 correspond to patients 1-4 in table S1 |                       |                                                                |                                                                                                              |

IART intra-atrial reentrant tachycardia; VT ventricular tachycardia; EPS electrophysiological study
